# Supplementary material for: Fluorescence quenching of 1-pyrene-carboxaldehyde by iodide ions in the presence of anionic (SDS) and cationic (CTAC) micelles: a quantitative treatment
Source: Royal Society of Chemistry journal article supplement (doi:10.1039/c5ra03412d), 2015-01-01
Supplement: c5ra03412d1.pdf [file c5ra03412d1.pdf]

## **ELECTRONIC SUPPLEMENTARY INFORMATION**

### **FLUORESCENCE QUENCHING OF 1-PYRENE-CARBOXALDEHYDE BY THE IODIDE ION IN THE PRESENCE OF ANIONIC (SDS) AND CATIONIC (CTAC) MICELLES: A QUANTITATIVE TREATMENT**

Eva Bernal<sup>†</sup>, José Antonio Lebron<sup>†</sup>, Beatriz Sarrion<sup>†</sup>, Pilar Lopez-Cornejo<sup>†</sup>, Carmen Carmona<sup>††</sup>, Francisco Sanchez<sup>†</sup> and Manuel Lopez-Lopez<sup>‡\*</sup>

<sup>†</sup>Department of Physical Chemistry. Faculty of Chemistry. University of Seville. c/  
Profesor García González s/n. 41012 Seville (Spain)

<sup>††</sup>Department of Physical Chemistry. Faculty of Pharmacy. University of Seville. c/  
Profesor García González s/n. 41012 Seville (Spain)

<sup>‡</sup>Department of Chemical Engineering, Physical Chemistry and Organic Chemistry.  
Faculty of Experimental Sciences. University of Huelva. Avda. Tres de Marzo s/n.  
Campus El Carmen. 21071 Huelva (Spain).

\* Author to whom all correspondence should be addressed ([manuel.lopez@diq.uhu.es](mailto:manuel.lopez@diq.uhu.es))

## 1.-Appendix 1

### DEDUCTION OF EQUATIONS 6 AND 21

The purpose of this appendix is to justify equations 6 and 21, that is, the equations for  $(K_{SV})_{obs}$  and  $a_b/a_f$  in the case where the fluorophore and the quencher are distributed between the continuous phase and the receptor. In this case, an equilibrium constant  $K_Q$  can be defined with an analogous meaning to the equilibrium constant  $K$ , of the fluorophore. Using  $K_Q$ , the following equations arise:

$$[Q_f] = \frac{1}{1 + K_Q[M]}[Q] \quad (a) \quad (A1-1)$$

$$[Q_b] = \frac{K_Q[M]}{1 + K_Q[M]}[Q] \quad (b)$$

It should be noted that this case is different to the case of anionic micelles. On the one hand,  $[Q_f]$  cannot be considered a constant and  $\approx [Q]$ , because the concentration of the quencher in solution depends on the concentration of the receptor (see equation A1-1a). On the other hand, not all the quenchers bound to the receptors,  $[Q_b]$ , are able to produce quenching of  $R_b^*$ . Only the quencher located at micelles also containing  $R_b^*$  are effective because, obviously, quenchers bound to receptors that do not contain excited fluorophore do not produce quenching. In relation to this, equation A1-1b may be misleading. According to this equation,  $[Q_b]$  increases with  $[M]$ , however, the average number of quenchers per micelle decreases when  $[M]$  increases. In fact, this number is given by:

$$\langle Q \rangle = \frac{[Q_b]}{[M]} = \frac{K_Q[Q]}{1 + K_Q[M]} \quad (A1-2)$$

Both  $[Q_f]$  and  $\langle Q \rangle$  depend on the concentration of the receptor and decrease when  $[M]$  increases. This fact changes the expression of  $(K_{SV})_{obs}$ , that now must be reformulated as:

$$\begin{aligned} (K_{SV})_{obs}[Q] &= \frac{(K_{SV})_f [Q_f] + (K_{SV})_b \frac{a_b}{a_f} K[M] \langle Q \rangle}{1 + \frac{a_b}{a_f} K[M]} = \\ &= \frac{(K_{SV})_f \frac{[Q]}{1 + K_Q[M]} + (K_{SV})_b \frac{a_b}{a_f} K[M] \frac{K_Q[Q]}{1 + K_Q[M]}}{1 + \frac{a_b}{a_f} K[M]} \end{aligned} \quad (A1-3)$$

Hence:

$$(K_{SV})_{obs} = \frac{(K_{SV})_f + (K_{SV})_b K_Q \frac{a_b}{a_f} K[M]}{\left(1 + \frac{a_b}{a_f} K[M]\right) (1 + K_Q[M])} = \frac{(K_{SV})_f + (K_{SV})_b K_Q K_{app} [M]}{1 + [K_Q + K_{app}] [M] + K_Q K_{app} [M]^2} \quad (A1-4)$$

$$\frac{a_b}{a_f} = \frac{(\varphi_b)_Q \varepsilon_b}{(\varphi_f)_Q \varepsilon_f}.$$

That is equation 6. Equation A1-4 (or 6) deserves some comments. The first point is to emphasize that this equation is the counterpart of equation A1-5 for the rate constant of processes in which ground state reactants participate.<sup>1</sup>

$$k_{obs} = \frac{k_f + k_b K_{R1} K_{R2} [M]}{(1 + K_{R1} [M]) (1 + K_{R2} [M])} \quad (A1-5)$$

However, in the case of photochemical reactions,  $K_{app} = K \cdot a_b/a_f$  appears instead of  $K$ .

In order to employ equation A1-4,  $(K_{SV})_f$ ,  $(K_{SV})_b$  and  $a_b/a_f$  must be known. But now,  $a_b/a_f$  depends on both the concentration of the quencher (in solution) and the concentration of the receptor, according to equation A1-2. The determination of  $(K_{SV})_f$  does not present any difficulties. However, in order to obtain  $(K_{SV})_b$  and  $a_b/a_f$ , the rate constants of the radiative, non-radiative and the quenching processes for the bound reactant must be known. These constants can be determined from fluorescence decay and emission quantum yield measurements, in the absence and presence of the quencher according to the following equations:

$$\begin{aligned}(\varphi_f)_0 &= \frac{(k_r)_f}{(k_r)_f + (k_{nr})_f} \\(k_{df})_0 &= (k_r)_f + (k_{nr})_f\end{aligned}\tag{A1-6}$$

$$\begin{aligned}(\varphi_f)_Q &= \frac{(k_r)_f}{(k_r)_f + (k_{nr})_f + (k_q)_f[Q]} \\(k_{df})_Q &= (k_r)_f + (k_{nr})_f + (k_q)_f[Q]\end{aligned}\tag{A1-7}$$

Using the same procedure in the presence of a given concentration of receptor, high enough to produce a situation in which all the fluorophores are bound to the receptors, the result will be:

$$\begin{aligned}(\varphi_b)_0 &= \frac{(k_r)_b}{(k_r)_b + (k_{nr})_b} \\(k_{db})_0 &= (k_r)_b + (k_{nr})_b\end{aligned}\tag{A1-8}$$

$$\begin{aligned}(\varphi_b)_Q &= \frac{(k_r)_b}{(k_r)_b + (k_{nr})_b + (k_q)_b \langle Q \rangle} = \frac{(k_r)_b}{(k_r)_b + (k_{nr})_b + (k_q)_b \frac{K_Q[Q]}{1 + K_Q[M]}} \\(k_{db})_Q &= (k_r)_b + (k_{nr})_b + (k_q)_b \langle Q \rangle = (k_r)_b + (k_{nr})_b + (k_q)_b \frac{K_Q[Q]}{1 + K_Q[M]}\end{aligned}\tag{A1-9}$$

Hence,  $(k_q)_b$  can be obtained if  $K_Q$  is known. Once  $(k_q)_b$  is obtained, the determination of  $(K_{SV})_b$  is straightforward:

$$(K_{SV})_b = k_{qb} \tau_{0b} = \frac{k_{qb}}{k_{db}^{Q \neq 0}} \quad (\text{A1-10})$$

Finally,  $a_b/a_f$  for each concentration of quencher and micelle, will be given by:

$$\begin{aligned} \frac{a_b}{a_f} &= \frac{(\varphi_b)_Q \varepsilon_b}{(\varphi_f)_Q \varepsilon_f} = \frac{\frac{(k_r)_b}{(k_r)_b + (k_{nr})_b + (k_q)_b \langle Q \rangle} \varepsilon_b}{\frac{(k_r)_f}{(k_r)_f + (k_{nr})_f + (k_q)_f [Q_f]} \varepsilon_f} = \\ &= \frac{\frac{(k_r)_b}{(k_r)_b + (k_{nr})_b + (k_q)_b \frac{K_Q [Q]}{1 + K_Q [M]}} \varepsilon_b}{\frac{(k_r)_f}{(k_r)_f + (k_{nr})_f + (k_q)_f \frac{[Q]}{1 + K_Q [M]}} \varepsilon_f} \end{aligned} \quad (\text{A1-11})$$

that is equation 21.

## 2.- Appendix 2

### ON THE MEANING OF $(K_{SV})_f$ IN MICELLAR SOLUTIONS: A GENERALIZATION OF THE TREATMENT

As mentioned in section 3.2,  $I_f$  is different from the emission intensity in the absence of a surfactant. This indicates some interactions of the monomers with the pyal. Indeed the Stern-Volmer constant at the cmc, to which  $(K_{SV})_f$  corresponds, is different from the value in the absence of surfactant ( $(K_{SV})_s = 50 \text{ mol}^{-1} \text{ dm}^3$ ). This implies that the monomers can be considered as *receptors*, in the sense that they interact with the pyal and change its properties. According to this, a micellar solution should be considered as a system containing two different receptors, monomers and micelles.

This question will be considered with some detail, because it is relevant not only in the case of micellar solutions. It is also of interest for the cases of biological receptors, such as DNA, that present different binding sites to which the ligands bind with different affinities.<sup>1</sup>

Consider the case of a solution containing two receptors m and M and the fluorophore. The emission intensity will be given by:

$$I = \frac{I_s + I_m K'_m [m] + I_M K'_M [M]}{1 + K'_m [m] + K'_M [M]} \quad (\text{A2-1})$$

In this equation  $K'_m$  and  $K'_M$  represent the (true) binding constant of the fluorophore to m and M, respectively, and  $I_m$  and  $I_M$  the corresponding emission intensities.  $I_s$  is the emission intensity of the free fluorophore, that is, in the solvent.

For the observed Stern-Volmer constant, one can write:

$$(K_{SV})_{\text{obs}} = \frac{(K_{SV})_s + (K_{SV})_m \frac{a_m}{a_s} K'_m [m] + (K_{SV})_M \frac{a_M}{a_s} K'_M [M]}{1 + \frac{a_m}{a_s} K'_m [m] + \frac{a_M}{a_s} K'_M [M]} \quad (\text{A2-2})$$

Equations A2-1 and A2-2 are the generalization of equations 4 and 7, respectively.

Now consider that the receptor m is present at constant concentration (the cmc in the case of micellar solutions). In this case equation A2-1 can be written as:

$$I = \frac{\frac{I_s + I_m K'_m [\text{cmc}]}{1 + K'_m [\text{cmc}]} + \frac{I_M K'_M [M]}{1 + K'_M [M]}}{1 + \frac{K'_M [M]}{1 + K'_m [\text{cmc}]}} \quad (\text{A2-3})$$

This equation can be expressed as equation 4, if one takes:

$$K = \frac{K'_M}{1 + K'_m[\text{cmc}]} \quad (\text{a})$$

(A2-4)

$$I_f = \frac{I_s + I_m K'_m[\text{cmc}]}{1 + K'_m[\text{cmc}]} \quad (\text{b})$$

Equations A2-4 give the meaning of the parameters  $I_f$  and  $K$  appearing in equation 4.

On the other hand, following a similar procedure it can be shown that equation A2-2, in the present case, can be reduced to equation 7 if:

$$(K_{SV})_f = \frac{(K_{SV})_s + (K_{SV})_m \frac{a_m}{a_s} K'_m[\text{m}]}{1 + \frac{a_m}{a_s} K'_m[\text{m}]} \quad (\text{A2-5})$$

and

$$\frac{a_b}{a_f} = \frac{\frac{a_M}{a_s} (1 + K'_m[\text{cmc}])}{1 + \frac{a_m}{a_s} K'_m[\text{cmc}]} = \frac{\frac{a_M}{a_s}}{\frac{1 + \frac{a_m}{a_s} K'_m[\text{cmc}]}{1 + K'_m[\text{cmc}]}} = \frac{\frac{a_M}{a_s}}{\frac{a_{\text{cmc}}}{a_s}} = \frac{a_M}{a_{\text{cmc}}} \quad (\text{A2-6})$$

In this equation  $a_{\text{cmc}} = \varphi_{\text{cmc}} \varepsilon_{\text{cmc}}$  and is given by

$$a_{\text{cmc}} = \frac{a_s + a_m K'_m[\text{cmc}]}{1 + K'_m[\text{cmc}]} \quad (\text{A2-7})$$

Of course  $a_{\text{cmc}}$  is different from  $a_m$ , because this latter parameter refers to a situation in which the fluorophore would be completely bound to the monomer and  $a_{\text{cmc}}$  corresponds to the cmc.

Figure S1

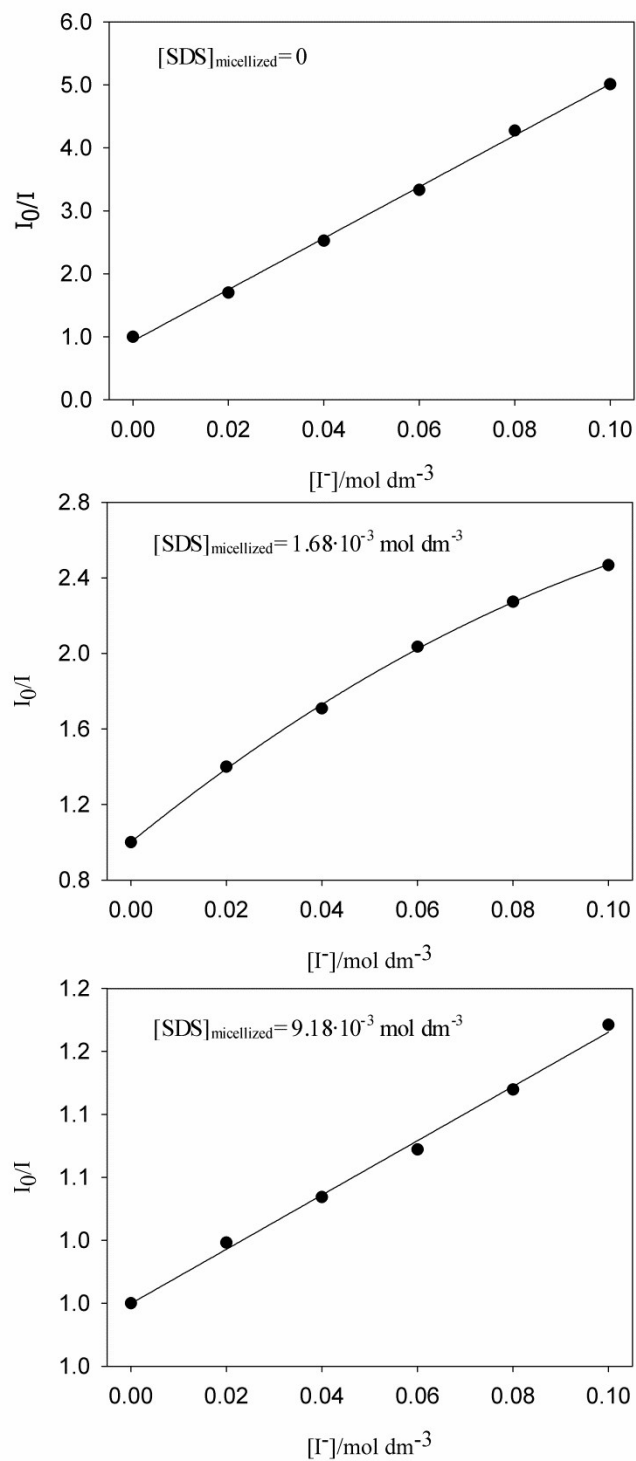

**Figure S1:** Stern-Volmer plot for the quenching of 1-pyrene-carboxaldehyde by iodide ion in micellar solutions of SDS at several micelles concentrations.

1. M. J. Hannon, *Chem. Soc. Rev.*, 2007, **36**, 280–295.
